# Supplementary material
Source: PubMed Central journal article supplement (PMC4939278)
Supplement: NIHMS776471-supplement.pdf [file NIHMS776471-supplement.pdf]

Supplementary Table 1: Parameters for MAP assays for plasma cytokines and their soluble receptors

| Variable          | Intra-assay CVs | Inter-assay CVs | MDL (pg/ml) |
|-------------------|-----------------|-----------------|-------------|
| IL-1beta (pg/ml)  | 2.8%            | 4.7%            | 0.2         |
| IL-1RA(ng/ml)     | 1.9%            | 8.8%            | 19.2        |
| IL-6 (pg/ml)      | 2.2%            | 8.3%            | 0.2         |
| sIL-6r (ng/ml)    | 1.9%            | 8.1%            | 19.8        |
| IL-10 (pg/ml)     | 2.4%            | 5.0%            | 0.1         |
| TNF alpha (pg/ml) | 2.5%            | 7.6%            | 0.5         |
| sTNFR2 (ng/ml)    | 3.6%            | 8.8%            | 5.9         |
| MCP-1 (pg/ml)     | 2.3%            | 5.4%            | 3.6         |

CV - coefficients of variation; MAP - multi-analyte profiling; MDL - method detection limit; IL-1 beta: interleukin 1 beta; IL-1RA: interleukin 1 receptor antagonist; IL-6: interleukin 6; sIL-6R: soluble interleukin 6 receptor; IL-10: interleukin 10; TNF alpha: tumor necrosis factor alpha; sTNFR2: soluble tumor necrosis factor receptor 2; MCP-1: monocyte chemoattractant protein 1

Supplementary Table 2: Correlations between Inflammatory Markers

|           | hsCRP | IL-1beta | IL-1RA  | IL-6    | sIL-6r  | IL-10  | TNF alpha | sTNFR2  | MCP-1   |
|-----------|-------|----------|---------|---------|---------|--------|-----------|---------|---------|
| hsCRP     | xxx   | 0.120    | 0.532** | 0.527** | 0.295** | 0.070  | 0.323**   | 0.391** | 0.174   |
| IL-1beta  |       | xxx      | 0.251*  | -0.031  | -0.052  | 0.229* | 0.275**   | 0.176   | 0.348** |
| IL-1RA    |       |          | xxx     | 0.351** | 0.180   | 0.023  | 0.378**   | 0.409** | 0.253*  |
| IL-6      |       |          |         | xxx     | 0.311** | 0.072  | 0.243*    | 0.310** | -0.009  |
| sIL-6r    |       |          |         |         | xxx     | 0.071  | 0.289**   | 0.314** | -0.001  |
| IL-10     |       |          |         |         |         | xxx    | 0.266*    | 0.107   | 0.065   |
| TNF alpha |       |          |         |         |         |        | xxx       | 0.600** | 0.225*  |
| sTNFR2    |       |          |         |         |         |        |           | xxx     | 0.250*  |
| MCP-1     |       |          |         |         |         |        |           |         | xxx     |

hsCRP: high sensitivity C-reactive protein; IL-1 beta: interleukin 1 beta; IL-1RA: interleukin 1 receptor antagonist; IL-6: interleukin 6; sIL-6R: soluble interleukin 6 receptor; IL-10: interleukin 10; TNF alpha: tumor necrosis factor alpha; sTNFR2: soluble tumor necrosis factor receptor 2; MCP-1: monocyte chemoattractant protein 1. All correlations are between the natural log of the indicated immune markers; \*p<0.05; \*\*p<0.01.

Supplementary Table 3: Correlations between Inflammatory Markers and Neurocognitive Tasks

|           | SMT    | CMT     | SRT     | CRT    | FTT     | DSST     | Trails | Factor Score |
|-----------|--------|---------|---------|--------|---------|----------|--------|--------------|
| hsCRP     | 0.148  | 0.077   | 0.156   | 0.109  | -0.111  | -0.194   | 0.112  | 0.173        |
| IL-1beta  | 0.067  | -0.008  | 0.039   | 0.016  | -0.140  | -0.132   | 0.037  | 0.040        |
| IL-1RA    | 0.078  | -0.028  | 0.090   | 0.096  | -0.105  | -0.087   | 0.083  | 0.100        |
| IL-6      | 0.254* | 0.235*  | 0.328** | 0.248* | -0.169  | -0.151   | 0.168  | 0.342**      |
| sIL-6r    | 0.106  | -0.035  | 0.022   | -0.089 | 0.129   | -0.070   | -0.009 | -0.050       |
| IL-10     | -0.075 | -0.243* | 0.004   | -0.077 | 0.115   | 0.210*   | -0.068 | -0.184       |
| TNF alpha | -0.079 | -0.038  | -0.001  | -0.036 | -0.022  | -0.148   | 0.062  | 0.023        |
| sTNFR2    | 0.028  | 0.138   | 0.175   | 0.181  | 0.051   | -0.090   | 0.161  | 0.132        |
| MCP-1     | 0.158  | 0.054   | 0.076   | 0.153  | -0.255* | -0.285** | 0.177  | 0.250*       |

SMT: Simple Choice Movement Time; CMT: Five Choice Movement Time; SRT: Simple Choice Reaction Time; CRT: Five Choice Reaction Time; FTT: Finger Tapping Task; DSST: Digit Symbol Substitution Task; Trails: Trails A; Factor Score: Principle Component Analysis Factor Score; hsCRP: high sensitivity C-reactive protein; IL-1 beta: interleukin 1 beta; IL-1RA: interleukin 1 receptor antagonist; IL-6: interleukin 6; sIL-6R: soluble interleukin 6 receptor; IL-10: interleukin 10; TNF alpha: tumor necrosis factor alpha; sTNFR2: soluble tumor necrosis factor receptor 2; MCP-1: monocyte chemoattractant protein 1. All correlations are between the natural log (Log) of the indicated immune markers and the psychomotor tasks, except for the Factor Score, which was calculated from the log of the individual psychomotor tasks; \*p<0.05; \*\*p<0.01; shaded boxes denote significant relationships in linear regression analyses.

Supplementary Table 4: Correlations between Inflammatory Markers and Neurocognitive Tasks in Females and Males

|           | Females |        |        | Males  |        |          |
|-----------|---------|--------|--------|--------|--------|----------|
|           | CMT     | SRT    | FTT    | CMT    | SRT    | FTT      |
| hsCRP     | 0.168   | 0.171  | -0.011 | -0.208 | -0.049 | -0.329   |
| IL-1beta  | 0.228   | 0.042  | -0.058 | -0.283 | 0.151  | -0.494** |
| IL-1RA    | 0.056   | -0.003 | 0.072  | -0.366 | 0.153  | -0.511** |
| IL-6      | 0.222   | 0.315* | -0.156 | 0.041  | 0.043  | 0.089    |
| sIL-6r    | 0.006   | 0.045  | 0.116  | -0.040 | 0.060  | 0.097    |
| IL-10     | -0.236  | -0.041 | 0.147  | -0.117 | 0.437* | -0.169   |
| TNF alpha | 0.029   | -0.064 | 0.042  | -0.152 | 0.362  | -0.310   |
| sTNFR2    | 0.137   | 0.066  | 0.124  | 0.123  | 0.466* | -0.110   |
| MCP-1     | 0.113   | 0.079  | -0.242 | 0.097  | 0.275  | -0.495** |

CMT: Five Choice Movement Time; SRT: Simple Choice Reaction Time; FTT: Finger Tapping Task; hsCRP: high sensitivity C-reactive protein; IL-1 beta: interleukin 1 beta; IL-1RA: interleukin 1 receptor antagonist; IL-6: interleukin 6; sIL-6R: soluble interleukin 6 receptor; IL-10: interleukin 10; TNF alpha: tumor necrosis factor alpha; sTNFR2: soluble tumor necrosis factor receptor 2; MCP-1: monocyte chemoattractant protein 1. All correlations are between the natural log (Ln) of the indicated immune markers and the psychomotor tasks; \*p<0.05; \*\*p<0.01; shaded boxes denote significant relationships in linear regression analyses.
